# Supplementary material
Source: PubMed Central journal article supplement (PMC2680159)
Supplement: NIHMS101299-supplement-SuppAll.pdf [file NIHMS101299-supplement-SuppAll.pdf]

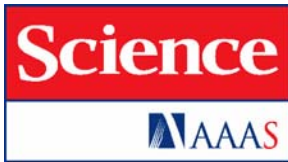

## Supporting Online Material for

### **Feedback Loops Shape Cellular Signals in Space and Time**

Onn Brandman and Tobias Meyer

E-mail: [Onn.Brandman@ucsf.edu](mailto:Onn.Brandman@ucsf.edu); [tobias1@stanford.edu](mailto:tobias1@stanford.edu)

Published 17 October 2008, *Science* **322**, 390 (2008)

DOI: 10.1126/science.1160617

#### **This PDF file includes:**

Table S1

#### **Other Supporting Online Material for this manuscript includes the following:**

available at [www.sciencemag.org/cgi/content/full/322/5900/390/DC1](http://www.sciencemag.org/cgi/content/full/322/5900/390/DC1)

Table S2 as zipped archive

# Equations for “Feedback loops shape cellular signals in space and time”

Onn Brandman and Tobias Meyer

September 6, 2008

For all equations,  $in$  is the input and  $\alpha$  is the output.

Figure 1A homeostat

$$\frac{d\alpha}{dt} = in - k_1 * \frac{\alpha^n}{\alpha^n + EC50^n} - \alpha$$

where  $n = 6$ ,  $EC50 = 0.1$ ,  $k_1 = 0.2$

Figure 1A signal limiter

$$\frac{d\alpha}{dt} = in - k_2 * \alpha^n - \alpha$$

where  $n = 5$ ,  $k_2 = 0.8$

Figure 1A adaptive system

$$\begin{aligned} \frac{d\alpha}{dt} &= in * (1 - \beta) - \alpha \\ \frac{d\beta}{dt} &= \tau_\beta * (\alpha - k_1 * \beta) \end{aligned}$$

where  $k_1 = 0.5$ ,  $\tau_\beta = 0.01$

Figure 1A transient generator

$$\begin{aligned} \frac{d\alpha}{dt} &= in - \alpha * \beta^n - \alpha \\ \frac{d\beta}{dt} &= \tau_\beta * (\alpha - k_1 * \beta) \end{aligned}$$

where  $n = 5$ ,  $k_1 = 0.05$ ,  $\tau_\beta = 0.01$

Figure 1B amplifier

$$\frac{d\alpha}{dt} = in + k_1 * \frac{\alpha^n}{\alpha^n + EC50^n} - \alpha$$

where  $k_1 = 0$  (no feedback) or 1 (feedback),  $n = 1$ ,  $EC50 = 2$

Figure 1B accelerator or delay

$$\frac{d\alpha}{dt} = in + k_1 * \frac{\alpha^n}{\alpha^n + EC50^n} - \alpha - \alpha^n$$

where  $k_1 = 0$  (no feedback) or 1 (delay) or 8 (accelerator),  $n = 5$ ,  $EC50 = 0.56$

Figure 1B bistable switch

$$\frac{d\alpha}{dt} = in + \frac{\alpha^n}{\alpha^n + EC50^n} - k_1 * \alpha$$

where  $n = 5$ ,  $EC50 = 0.8$ ,  $k_1 = 0.1$

Figure 1C bistable pulse generator

$$\begin{aligned} \frac{d\alpha}{dt} &= in + \frac{\alpha^n}{\alpha^n + EC50^n} - \alpha - \alpha * \beta \\ \frac{d\beta}{dt} &= \tau_\beta * (\alpha - k_1 * \beta) \end{aligned}$$

where  $n = 4$ ,  $\tau_\beta = 0.01$ ,  $k_1 = 0.01$

Figure 1C oscillator

$$\begin{aligned} \frac{d\alpha}{dt} &= in + \frac{\alpha^n}{\alpha^n + EC50^n} - \alpha - k_1 * \alpha * \beta^n \\ \frac{d\beta}{dt} &= \tau_\beta * (\alpha - \beta) \end{aligned}$$

where  $n = 4$ ,  $k_1 = 10$ ,  $\tau_\beta = 0.01$

Figure 2A combined limiter and homeostat

$$\frac{d\alpha}{dt} = in - k_1 * \frac{\alpha^{n1}}{\alpha^{n1} + EC50^{n1}} - k_2 * \alpha^{n2} - \alpha$$

where  $n1 = 6$ ,  $EC50 = 0.1$ ,  $k_1 = 0.2$ ,  $k_2 = 0.8$ ,  $n2 = 5$

Figure 2B robust oscillator

$$\begin{aligned} \frac{d\alpha}{dt} &= in * (1 - k_2 * \gamma) + \frac{\alpha^n}{EC50^n + \alpha^n} - \alpha - k_1 * \alpha * \beta^n \\ \frac{d\beta}{dt} &= \tau_\beta * (\alpha - \beta) \\ \frac{d\gamma}{dt} &= \tau_\gamma * (\alpha - \gamma) \end{aligned}$$

where  $n = 4$ ,  $k_1 = 10$ ,  $\tau_\beta = 0.01$ ,  $k_2 = 0.6$ ,  $\tau_\gamma = 0.005$

Figure 2C robust switch

$$\begin{aligned} \frac{d\alpha}{dt} &= \frac{\beta + \gamma}{(\beta + \gamma) + 1} - \alpha \\ \frac{d\beta}{dt} &= \tau_\beta * \left( \frac{(in + \alpha)^n}{EC50^n + (in + \alpha)^n} - \beta \right) \\ \frac{d\gamma}{dt} &= \tau_\gamma * \left( \frac{\alpha^n}{\alpha^n + EC50^n} - \gamma \right) \end{aligned}$$

where  $n = 6$ ,  $EC50 = 0.5$ ,  $\tau_\beta = 1$ ,  $\tau_\gamma = 0.05$

Figure 1C all spatial panels

We modeled arrays of pixels by using 2-dimensional convolution to simulate spatial spreading.

Figure 1C local pulse

For a single pixel:

$$\begin{aligned}\frac{d\alpha}{dt} &= in + \frac{\alpha_{g\alpha}^n}{EC50^n + \alpha_{g\alpha}^n} - \beta * \alpha + k_1 * \alpha \\ \frac{d\beta}{dt} &= \tau_\beta * (\alpha_{g\beta} - k_2 * \beta)\end{aligned}$$

where  $\alpha_{g\alpha}$  and  $\alpha_{g\beta}$  are the values for the pixels after 2-dimensional convolution with a Gaussian filter with standard deviation of 2 and 4 pixels, respectively,  $\tau_\beta = 5$ ,  $k_1 = 0.1$ ,  $k_2 = 0.01$ ,  $n = 4$ ,  $EC50 = 0.2$

Figure 1C traveling wave

For a single pixel:

$$\begin{aligned}\frac{d\alpha}{dt} &= in + \frac{\alpha_g^n}{EC50^n + \alpha_g^n} - (\beta + k_{\alpha off}) * \alpha \\ \frac{d\beta}{dt} &= \tau_\beta * (\alpha_g - k_{\beta off} * \beta)\end{aligned}$$

where  $\alpha_g$  is the value for the pixel after 2-dimensional convolution with a Gaussian filter with standard deviation of 2 pixels,  $\tau_\beta = 0.8$ ,  $k_{\alpha off} = 0.1$ ,  $k_{\beta off} = 0.1$ ,  $n = 4$ ,  $EC50 = 0.2$

Figure 1C polarity

A membrane recruitment model was used, where the total amount of signaling component is fixed and  $\alpha$  represents the amount of signaling component bound to a single pixel of membrane.

$$\frac{d\alpha}{dt} = \left(in + \frac{\alpha_g^n}{EC50^n + \alpha_g^n}\right) * (\alpha_{total} - \alpha_{bound}) - k_{off} * \alpha$$

where  $\alpha_g$  is the value for the pixel after 2-dimensional convolution with a Gaussian filter with standard deviation of 2 pixels,  $\alpha_{total} = 10$ ,  $\alpha_{bound} = \sum_{all\ pixels} \alpha$ ,  $k_{off} = 0.05$ ,  $n = 2$ ,  $EC50 = 0.2$
